# Supplementary material for: SENP3-mediated host defense response contains HBV replication and restores protein synthesis
Source: PubMed Central journal article supplement (PMC6331149; doi:10.1371/journal.pone.0209179), 2019-01-14
Supplement: pone.0209179.s001.pdf [file pone.0209179.s001.pdf]

## S1 Table. Detailed information for selected reagents

### (A) MISSION shRNA constructs (Sigma-Aldrich) used for gene knockdown

| Target Gene   | TRC Number     | Product Details                                                                                       |                       |
|---------------|----------------|-------------------------------------------------------------------------------------------------------|-----------------------|
| <b>SENP3</b>  | TRCN0000004109 | <b>Region:</b> CDS<br><b>Sequence:</b> CCGGCCTCGCTGACATTCCACTGGACTCGAGTCCAGTGG<br>AATGTCAGCGAGGTTTTT  | <b>TRC Version:</b> 1 |
| <b>IQGAP2</b> | TRCN0000414490 | <b>Region:</b> CDS<br><b>Sequence:</b> CCGGACTAGAGGTTGCACGATTAAGCTCGAGCTTAATCGT<br>GCAACCTCTAGTTTTTTT | <b>TRC Version:</b> 2 |

### (B) Primary antibodies used for immunoblotting and immunofluorescence staining

| Target Protein   | Antibody                                                         | Vendor                    |
|------------------|------------------------------------------------------------------|---------------------------|
| <b>SENP3</b>     | SENP3 (D20A10) Rabbit mAb                                        | Cell Signaling Technology |
| <b>Actin</b>     | $\beta$ -Actin (13E5) Rabbit mAb                                 | Cell Signaling Technology |
| <b>P-Akt</b>     | Phospho-Akt Ser473 (D9E) XP <sup>®</sup> Rabbit mAb              | Cell Signaling Technology |
| <b>Akt</b>       | Akt (pan) (C67E7) Rabbit mAb                                     | Cell Signaling Technology |
| <b>IQGAP2</b>    | IQGAP2 (D1X8U) Rabbit mAb                                        | Cell Signaling Technology |
| <b>Ubiquitin</b> | Ubiquitin (P4D1) Mouse mAb                                       | Cell Signaling Technology |
| <b>P-S6</b>      | Phospho-S6 Ribosomal Protein (Ser235/236) (D57.2.2E) Rabbit mAb  | Cell Signaling Technology |
| <b>S6</b>        | S6 Ribosomal Protein (5G10) Rabbit mAb                           | Cell Signaling Technology |
| <b>Puromycin</b> | Anti-puromycin antibody clone 12D10                              | Sigma-Aldrich             |
| <b>Sumo 2/3</b>  | Anti-Sumo 2+3 antibody [8A2]                                     | Abcam                     |
| <b>HBx</b>       | Anti-Hepatitis B Virus X antigen antibody [3F6-G10]              | Abcam                     |
| <b>HBc</b>       | Anti-Hepatitis B Virus Core Antigen antibody [14E11]             | Abcam                     |
| <b>HBsAg</b>     | Anti-Hepatitis B Virus Surface Antigen (Ad/Ay) antibody (ab9193) | Abcam                     |

### (C) Primers used for RT-qPCR

| Target Gene       | Forward (5' to 3')     | Reverse (5' to 3')      |
|-------------------|------------------------|-------------------------|
| <b>SENP3</b>      | ACAGAACTGGCTCAATGACC   | TCCACCTTTTCACCCCATC     |
| <b>IQGAP2</b>     | CCCTTGATCTACTGCCTTATGG | GGCTGGATTCATGTACCGATAG  |
| <b>HBV-PC</b>     | GGTCTGCGCACCAGCACC     | GAACCTTAGGCCCATATTAGTG  |
| <b>HBV-X</b>      | CGTCTGTGCCTTCTCATCTG   | ACATTGCTGAGAGTCCAAGAG   |
| <b>Beta-actin</b> | CGCGAGAAGATGACCCAGAT   | ACAGCCTGGATAGCAACGTACAT |
