# Supplementary material for: SENP3-mediated host defense response contains HBV replication and restores protein synthesis
Source: PubMed Central journal article supplement (PMC6331149; doi:10.1371/journal.pone.0209179), 2019-01-14
Supplement: pone.0209179.s009.pdf [file pone.0209179.s009.pdf]

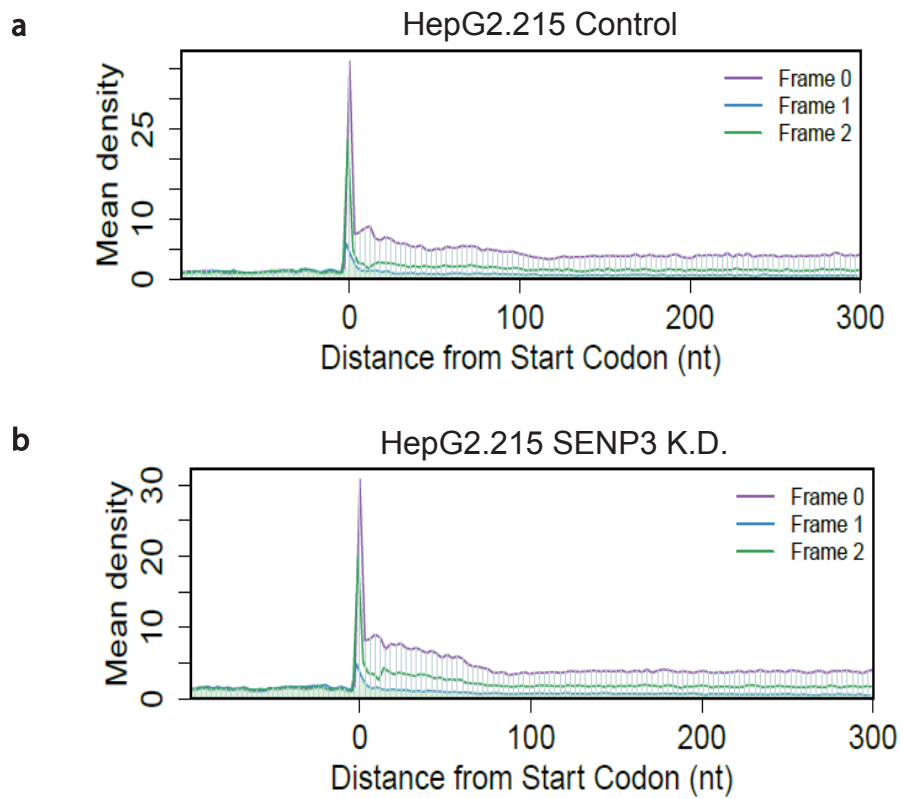

**S7 Fig. Ribo-seq quality control.**

(A) Quality control of Ribo-seq library from HepG2.215-control cells.

(B) Quality control of Ribo-seq library from HepG2.215-SENP3 K.D. cells.
